# Supplementary material for: Bromide-assisted catalytic oxidation of lead(ii) solids by chlorine in drinking water distribution systems
Source: Royal Society of Chemistry journal article supplement (doi:10.1039/c7cc02533e), 2017-01-01
Supplement: c7cc02533e1.pdf [file c7cc02533e1.pdf]

**Bromide-Assisted Catalytic Oxidation of Lead(II) Solids by Chlorine in  
Drinking Water Distribution Systems**

John Orta<sup>†</sup>, Samuel Patton<sup>†‡</sup> and Haizhou Liu<sup>†\*</sup>

<sup>†</sup> Department of Chemical and Environmental Engineering, University of California at  
Riverside, Riverside, CA 92521 USA

<sup>‡</sup> Program of Environmental Toxicology, University of California, Riverside, CA  
92521 USA

\* Corresponding author, e-mail: haizhou@engr.ucr.edu,  
phone (951) 827-2076, fax (951) 827-5696.

*Submitted to Chemical Communications*

*(Invited Submission to Emerging Investigators Issue 2017)*

## Table of Contents

|                                                                                                                                                                                                                                                                                                                                   |   |
|-----------------------------------------------------------------------------------------------------------------------------------------------------------------------------------------------------------------------------------------------------------------------------------------------------------------------------------|---|
| <b>Figure S1</b> XRD spectra of synthesized hydroxylpyromorphite $\text{Pb}_5(\text{PO}_4)_3\text{OH}_{(s)}$ . .....                                                                                                                                                                                                              | 3 |
| <b>Figure S2</b> Consumption of chlorine during the oxidation of cerussite $\text{PbCO}_{3(s)}$ by chlorine at varying bromide concentrations. pH = 7.0, initial $[\text{Cl}_2] = 50 \text{ mg/L}$ , initial $[\text{PbCO}_3] = 0.56 \text{ g/L}$ , ionic strength = 10 mM, $\text{TOTCO}_3 = 1 \text{ mM}$ . .....               | 4 |
| <b>Figure S3</b> Oxidation of $\text{Pb}_5(\text{PO}_4)_3\text{OH}_{(s)}$ by chlorine at varying initial bromide concentrations. pH = 7.0, initial $[\text{Cl}_2] = 50 \text{ mg/L}$ , initial $[\text{Pb}_5(\text{PO}_4)_3\text{OH}_{(s)}] = 0.56 \text{ g/L}$ , ionic strength = 10 mM, $\text{TOTCO}_3 = 1 \text{ mM}$ . ..... | 5 |
| <b>Figure S4</b> Oxidation of $\text{Pb}_5(\text{PO}_4)_3\text{OH}_{(s)}$ by bromine at pH = 7.0, initial $[\text{Br}_2] = 50 \text{ mg/L}$ as chlorine, initial $[\text{Pb}_5(\text{PO}_4)_3\text{OH}_{(s)}] = 0.56 \text{ g/L}$ , ionic strength = 10 mM, $\text{TOTCO}_3 = 1 \text{ mM}$ . .....                               | 6 |

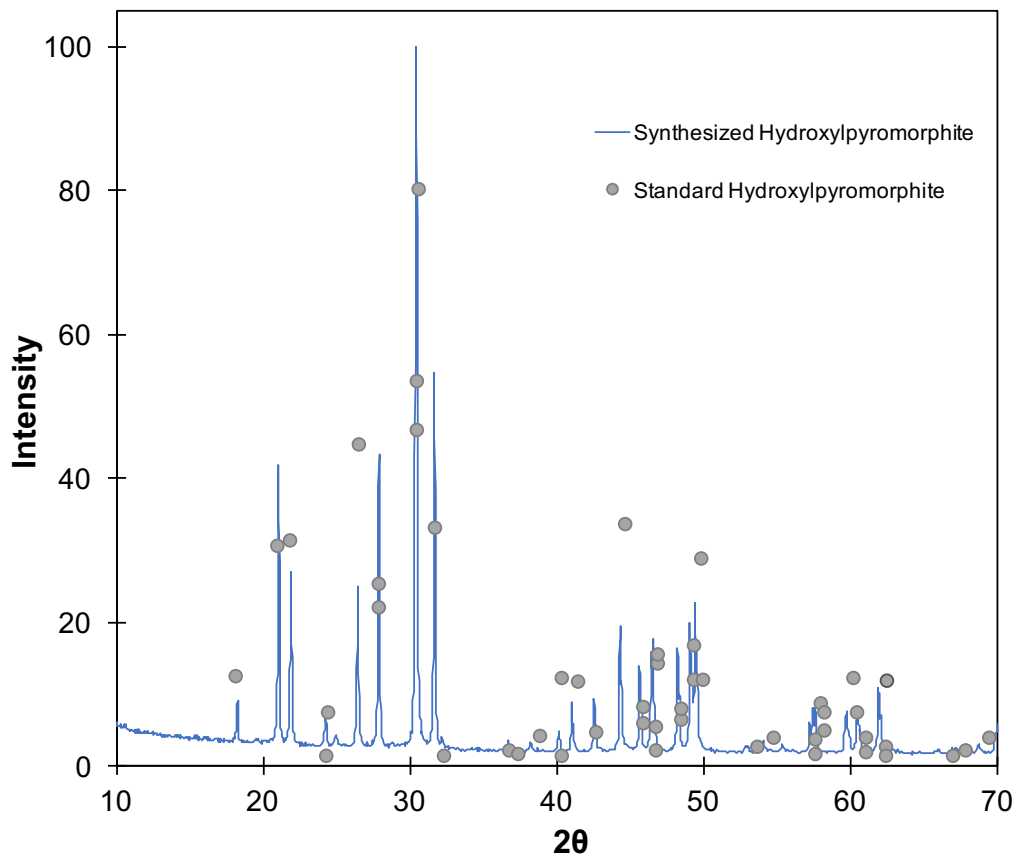

**Figure S1** XRD spectra of synthesized hydroxylpyromorphite  $\text{Pb}_5(\text{PO}_4)_3\text{OH}_{(s)}$ .

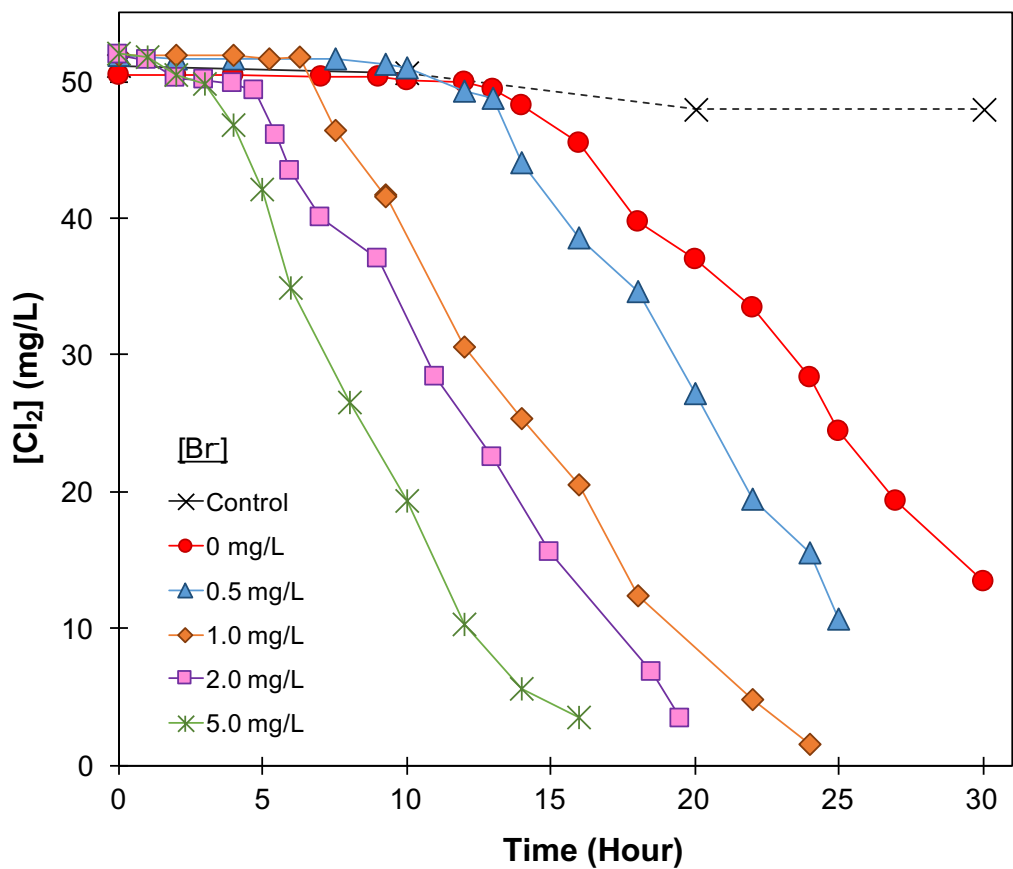

**Figure S2** Consumption of chlorine during the oxidation of cerussite  $\text{PbCO}_{3(s)}$  by chlorine at varying bromide concentrations. pH = 7.0, initial  $[\text{Cl}_2] = 50 \text{ mg/L}$ , initial  $[\text{PbCO}_3] = 0.56 \text{ g/L}$ , ionic strength = 10 mM,  $\text{TOTCO}_3 = 1 \text{ mM}$ .

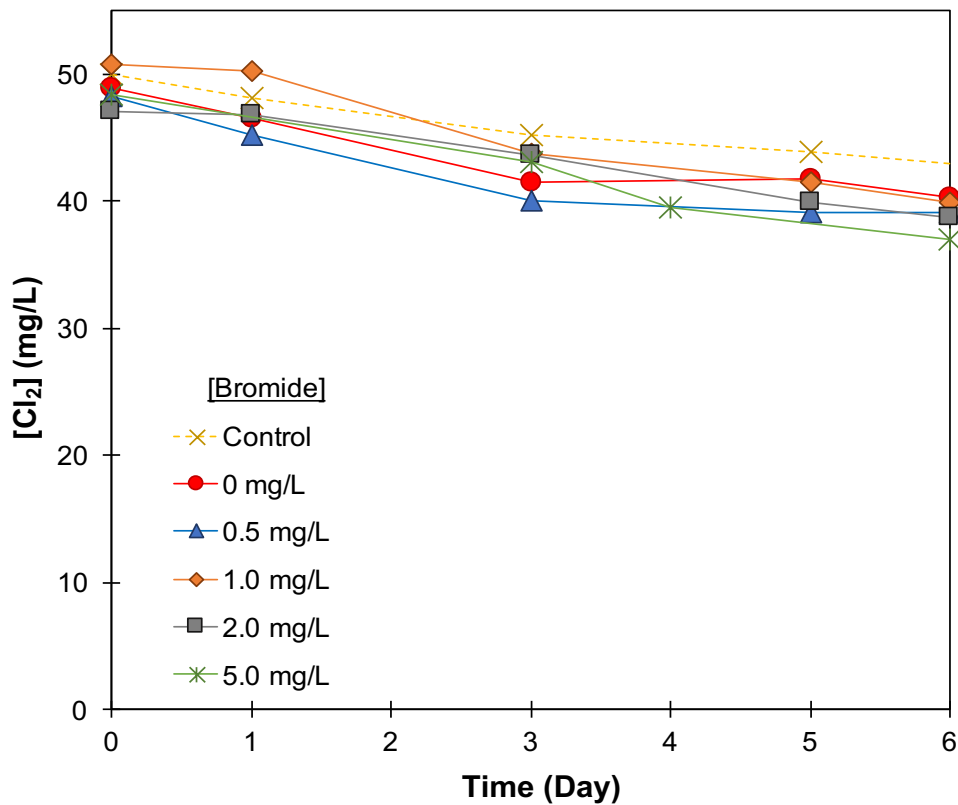

**Figure S3** Oxidation of  $\text{Pb}_5(\text{PO}_4)_3\text{OH}_{(s)}$  by chlorine at varying initial bromide concentrations. pH = 7.0, initial  $[\text{Cl}_2] = 50 \text{ mg/L}$ , initial  $[\text{Pb}_5(\text{PO}_4)_3\text{OH}_{(s)}] = 0.56 \text{ g/L}$ , ionic strength = 10 mM,  $\text{TOTCO}_3 = 1 \text{ mM}$ .

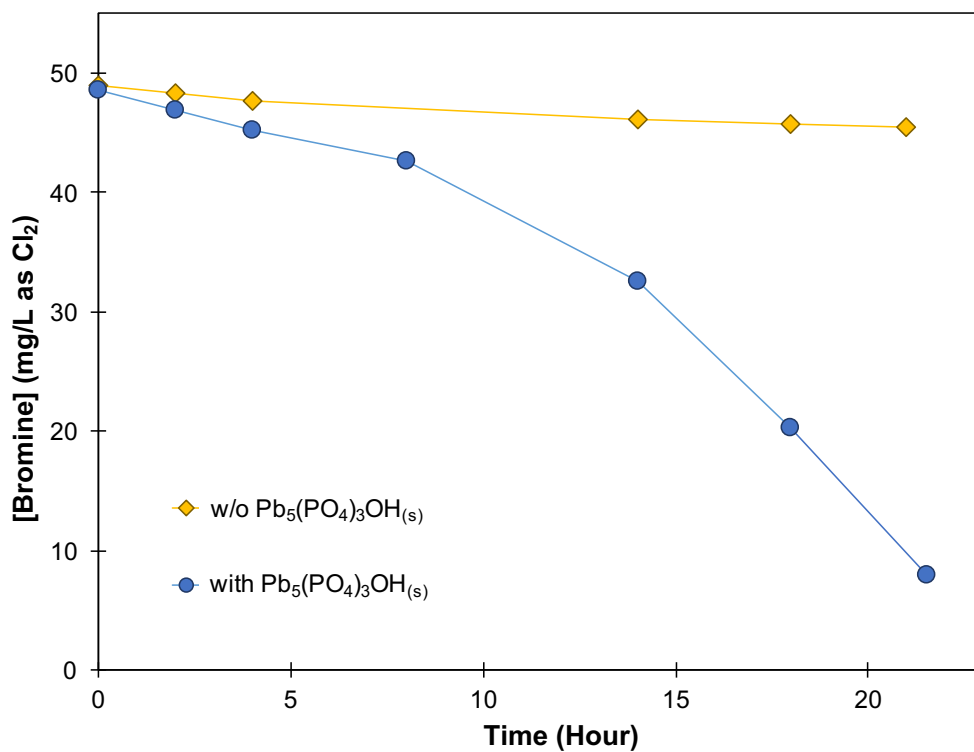

**Figure S4** Oxidation of  $\text{Pb}_5(\text{PO}_4)_3\text{OH}_{(s)}$  by bromine at  $\text{pH} = 7.0$ , initial  $[\text{Br}_2] = 50 \text{ mg/L}$  as chlorine, initial  $[\text{Pb}_5(\text{PO}_4)_3\text{OH}_{(s)}] = 0.56 \text{ g/L}$ , ionic strength = 10 mM,  $\text{TOTCO}_3 = 1 \text{ mM}$ .
